# Supplementary material
Source: publisher figshare collection journal article supplement (https://acs.figshare.com/ndownloader/files/3733636)
Supplement: Supplementary file 1 [file 3733636]

## **DNA-Directed Fluorescence Switching of Silver Clusters**

Mainak Ganguly,<sup>°</sup> Cara Bradsher,<sup>°</sup> Peter Goodwin,<sup>‡</sup> and Jeffrey T. Petty<sup>°</sup>

<sup>°</sup>Department of Chemistry  
Furman University  
Greenville, SC 29613

And

<sup>‡</sup>Center for Integrated Nanotechnologies,  
Los Alamos National Laboratory  
Los Alamos NM 87545

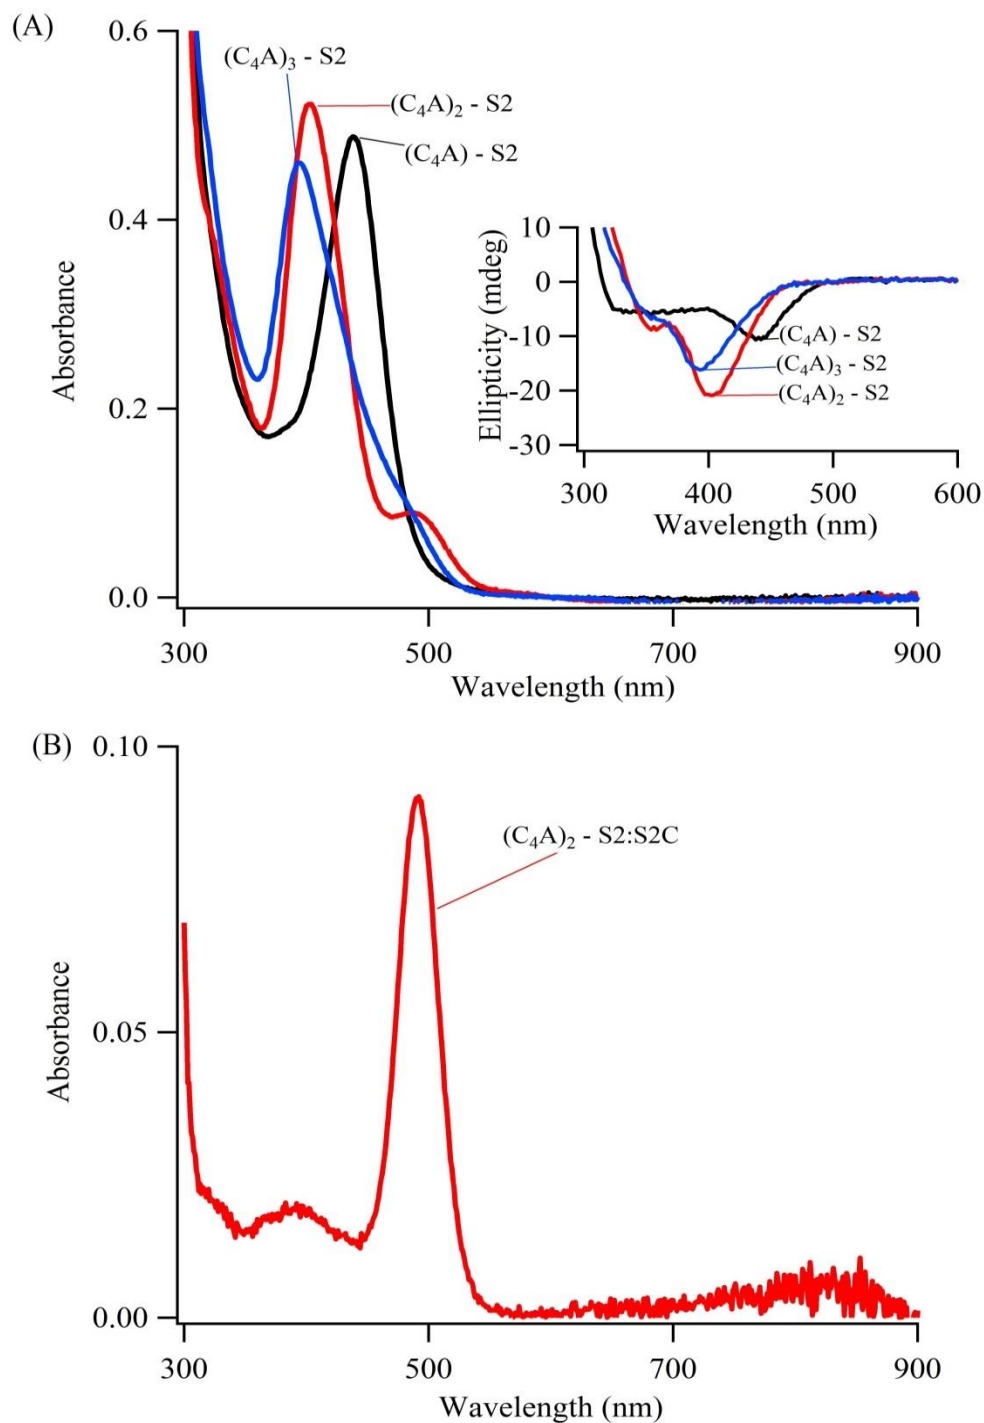

**Figure S1:** (A) Absorption spectra of the precursor violet clusters that form with the single-stranded S1-S2 oligonucleotides in water. The S1 cluster domains are  $C_4A$  (black),  $(C_4A)_2$  (red), and  $(C_4A)_3$  (blue). Similar  $\lambda_{\max}$  for these bands suggest that the violet clusters develop in similar chemical and electronic environments. We are currently investigating the shoulder at ~500 nm. The inset shows the circular dichroism spectra of the violet cluster adducts. (B) Absorption spectra of the hybridized  $(C_4A)_2$ -S2:S2C construct at a lower 2  $\mu$ M oligonucleotide concentration. The corresponding spectrum at 10  $\mu$ M oligonucleotide (Figure 2 – red spectrum) shows two absorptions at 490 and 750 nm, whereas the above spectrum has on the 490 nm band.

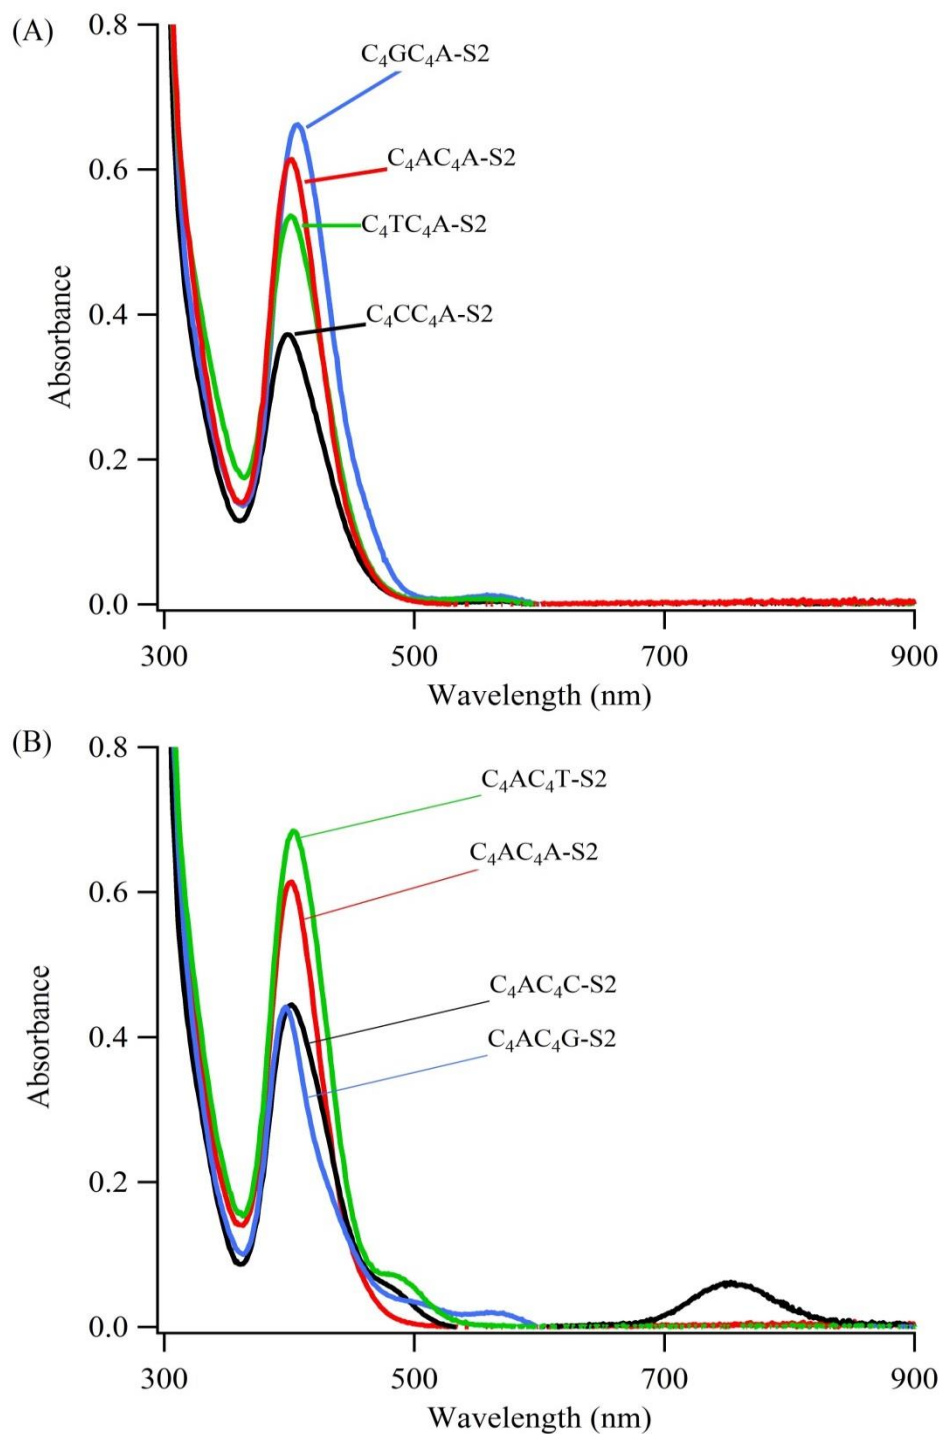

**Figure S2:** (A) Absorption spectra of  $C_4\mathbf{X}C_4A$ -S2 oligonucleotides with  $\mathbf{X}$  = adenine (red),  $\mathbf{X}$  = cytosine (black),  $\mathbf{X}$  = guanine (blue), and  $\mathbf{X}$  = thymine (green). (B) Absorption spectra of  $C_4AC_4\mathbf{Y}$ -S2 oligonucleotides with  $\mathbf{Y}$  = adenine (red),  $\mathbf{Y}$  = cytosine (black),  $\mathbf{Y}$  = guanine (blue), and  $\mathbf{Y}$  = thymine (green). Similar  $\lambda_{\max}$  values in both sets of spectra indicate that the violet clusters developed in similar chemical and electronic environments.

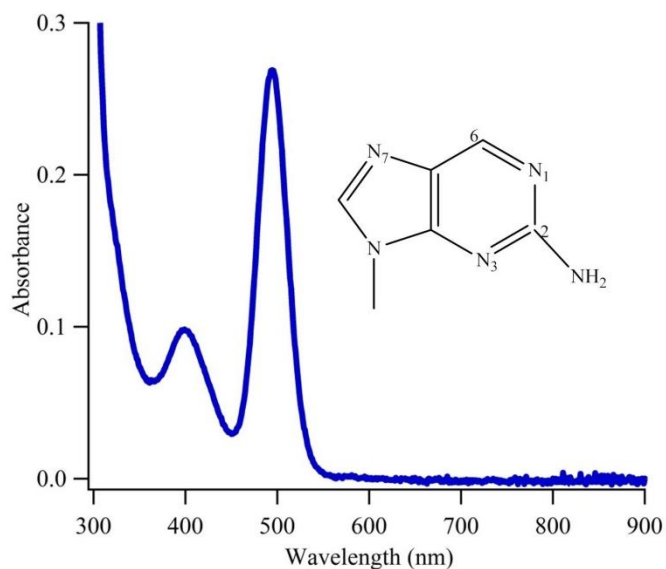

**Figure S3:** Absorption spectra of  $C_4(2AP)C_4T-S2:S2C$  construct 2-AP = 2-aminopurine. Adenine also exhibits a strong absorption at 490 nm (Figure 3A – red spectrum).

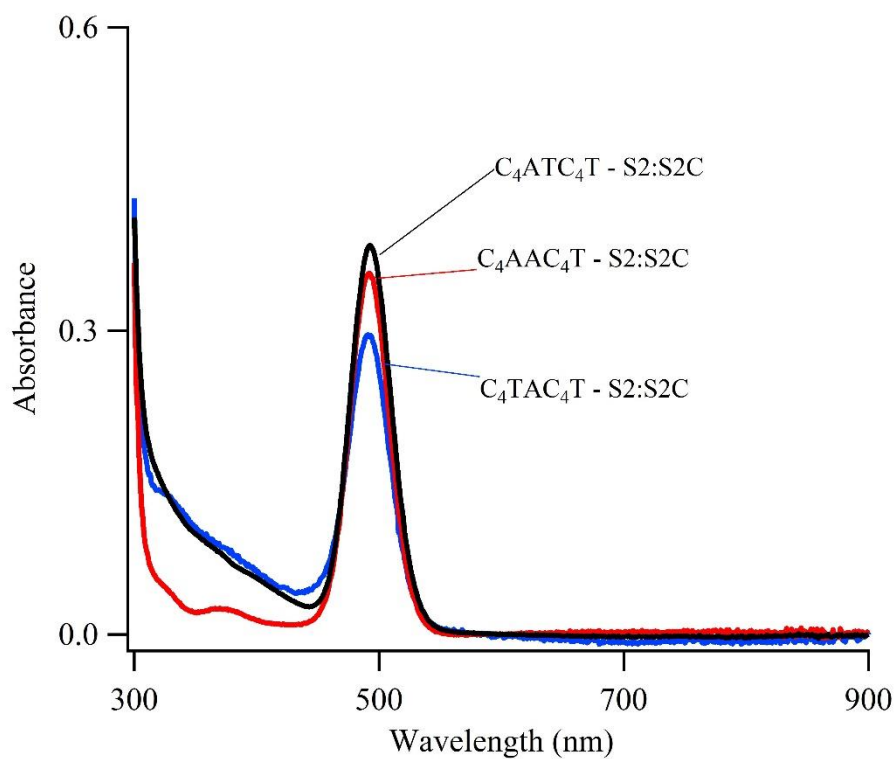

**Figure S4:** Absorption spectra of  $C_4ATC_4T-S2:S2C$  (black),  $C_4AAC_4T-S2:S2C$  (red), and  $C_4TAC_4T-S2:S2C$  (blue) constructs.

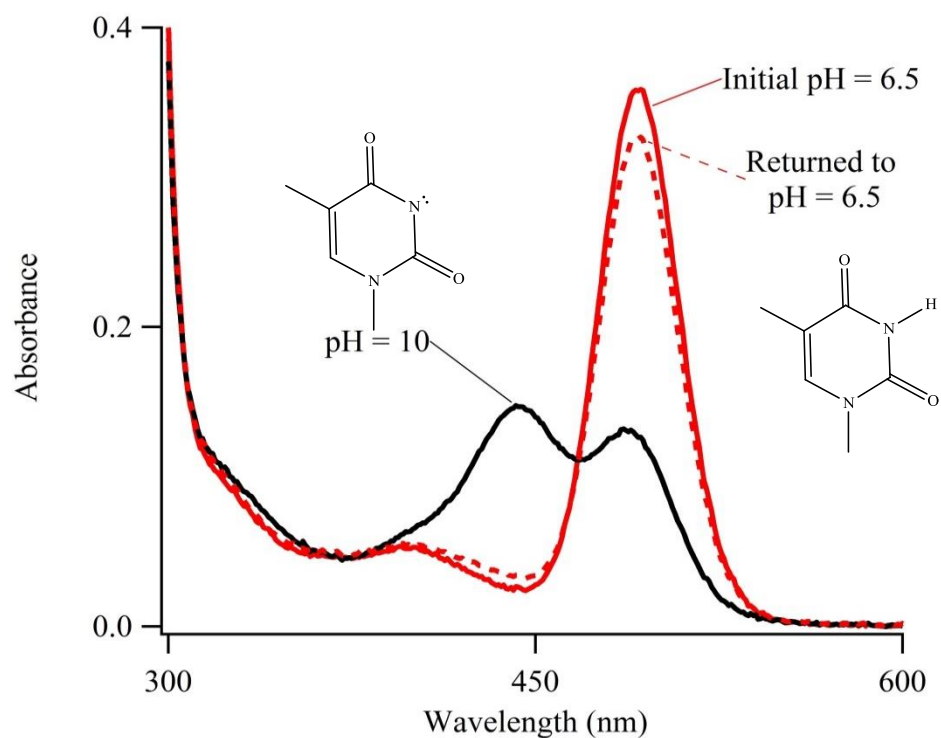

**Figure S5:** Absorption spectra of C<sub>4</sub>AC<sub>4</sub>T-S<sub>2</sub>:S<sub>2</sub>C at pH 6.5 (solid red spectrum), pH = 10 (solid black spectrum), and returned to pH = 6.5 (dotted red spectrum).

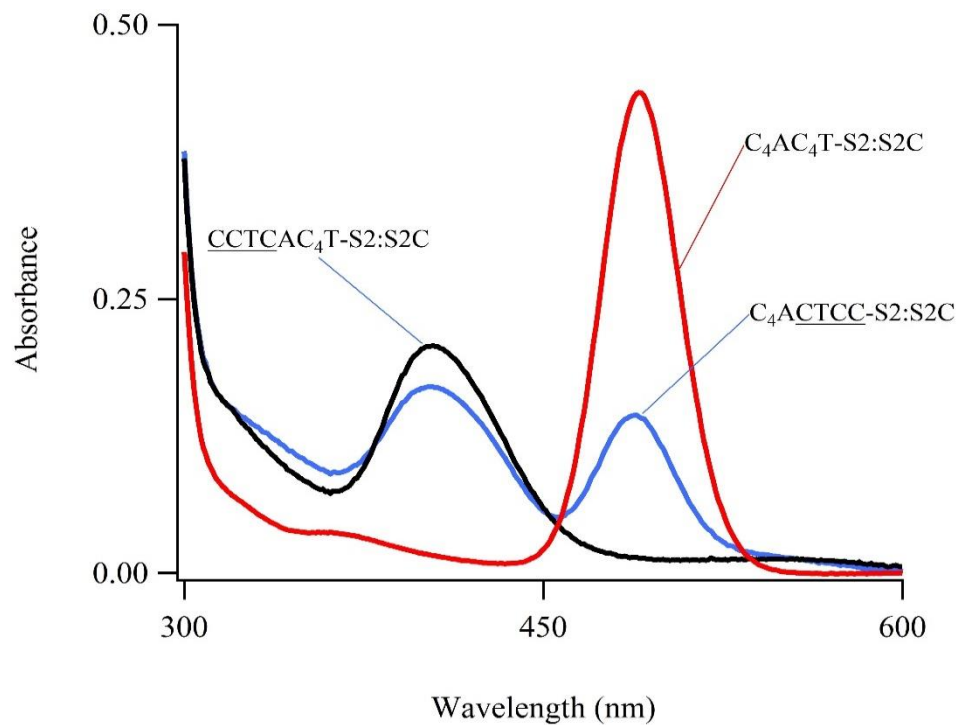

**Figure S6:** Absorption spectra of C<sub>4</sub>AC<sub>4</sub>T-S<sub>2</sub>:S<sub>2</sub>C (red), C<sub>2</sub>TCAC<sub>4</sub>T-S<sub>2</sub>:S<sub>2</sub>C (black), and C<sub>4</sub>ACTC<sub>2</sub>T-S<sub>2</sub>:S<sub>2</sub>C (blue).

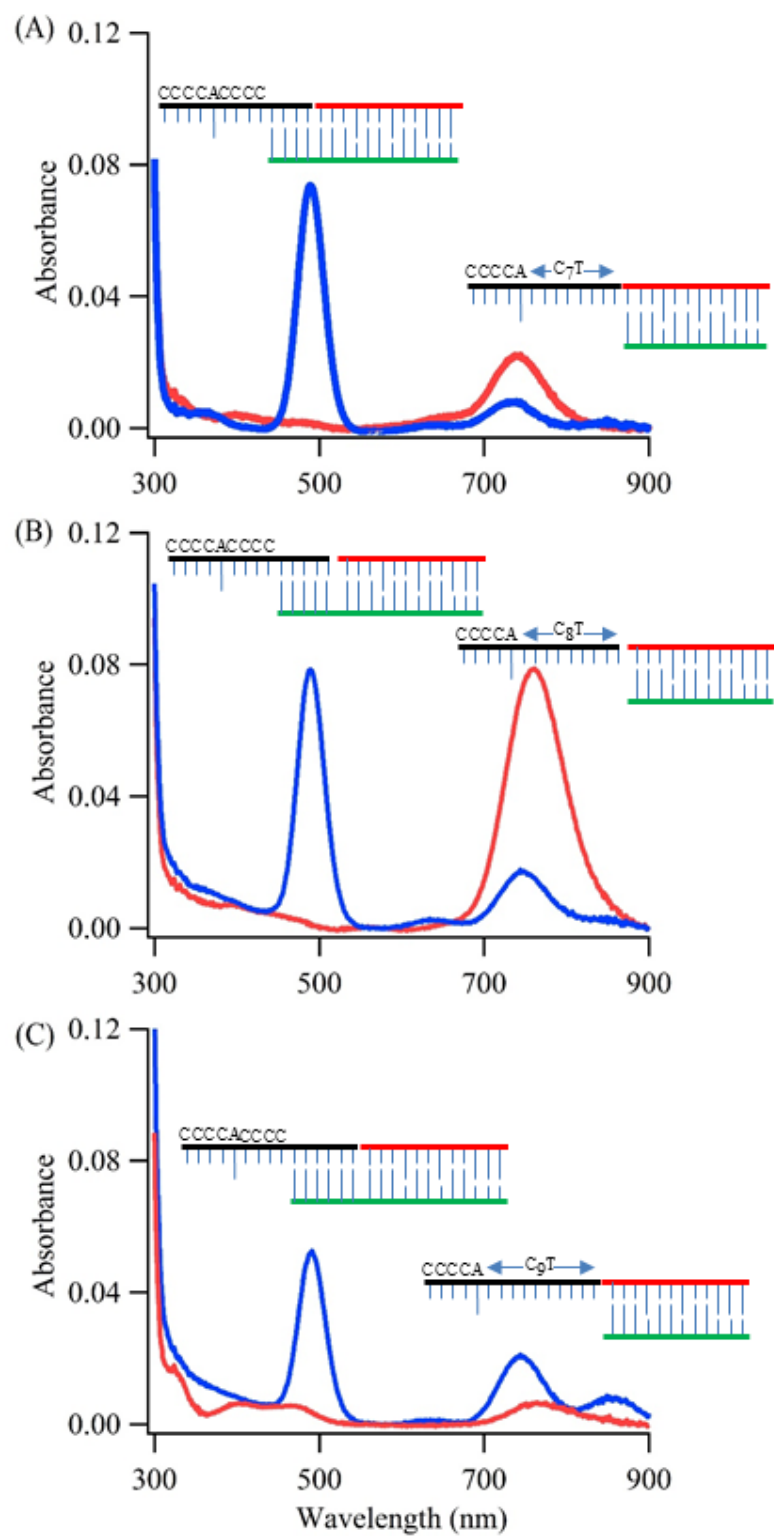

**Figure S7:** Absorption spectra of  $C_4AC_nT$ -S2 strands with  $n = 7$  (A),  $8$  (B), and  $9$  (C). The 12-nucleotide S2C complements favor the near-infrared clusters (red spectra). The longer  $G_{n-4}A$ -S2C complements favor the blue-green cluster.
